# Supplementary material for: The role of Wnt signaling in neuronal dysfunction in Alzheimer's Disease
Source: Springer Nature journal article supplement (doi:10.1186/1750-1326-3-9), 2008-01-01

LRP 5/6

Wnt

Fzd

Axin

Dvl

APC

$\beta$ -cat

$\beta$ -cat

$\beta$ -cat

GSK-3 $\beta$

Low Enzyme Activity

$\beta$ -cat

$\beta$ -cat

$\beta$ -cat

$\beta$ -cat

$\beta$ -cat

Tcf/Lef

Wnt Target Genes

Canonical Pathway

Normal Wnt Signaling

A $\beta$

A $\beta$

A $\beta$

Axin

APC

$\beta$ -cat

$\beta$ TrCP

GSK-3 $\beta$

High Enzyme Activity

P P P

$\beta$ -cat

Ub

Ub

Ub

Proteosomal Degradation

Inhibited Wnt Signaling

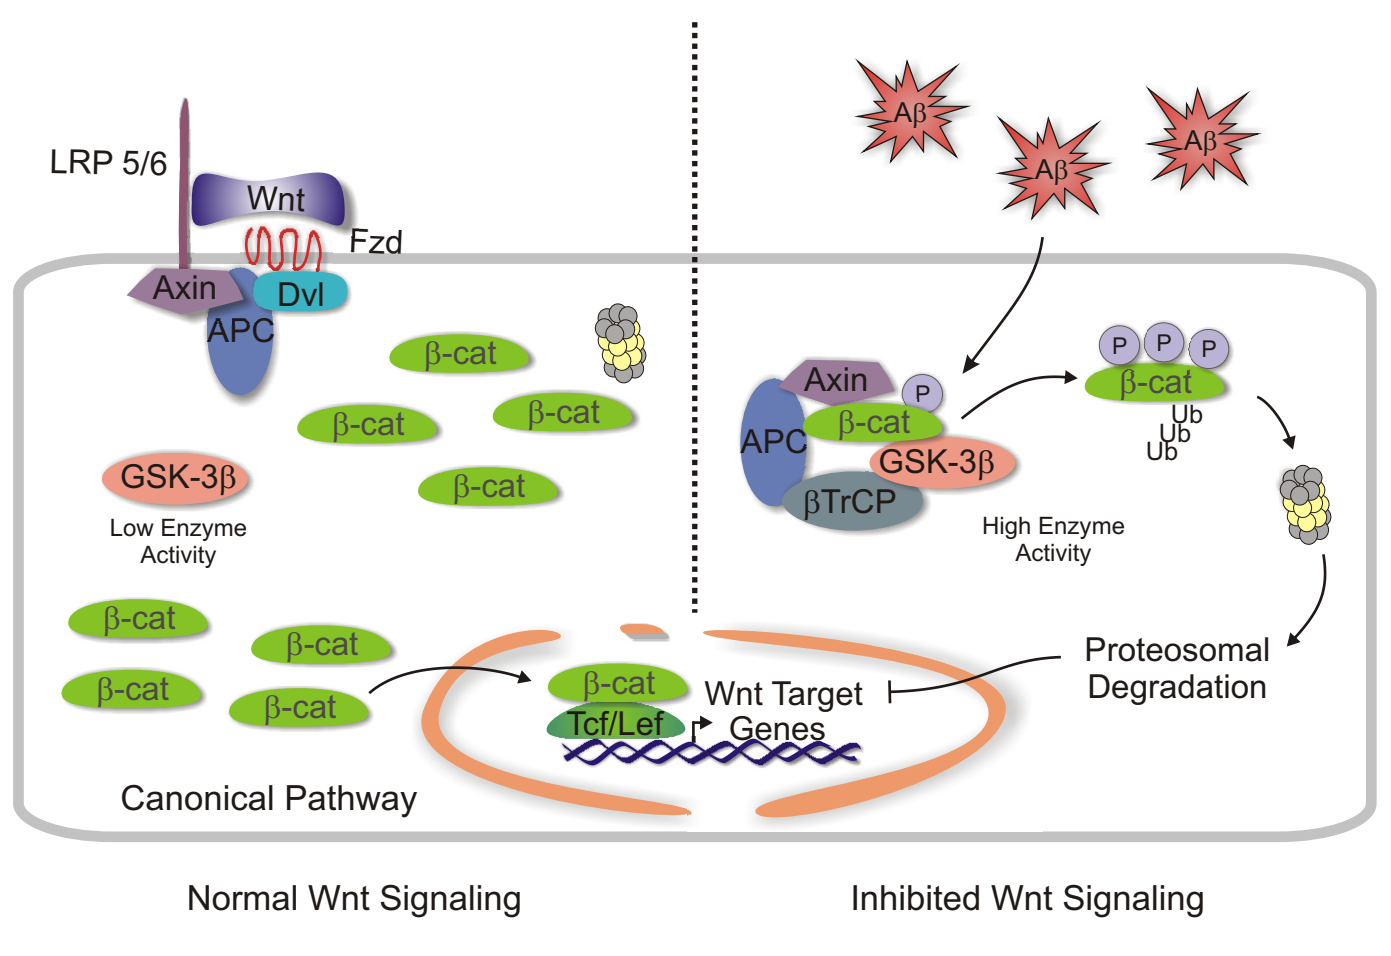

Supplement: 13024_2008_51_MOESM1_ESM.pdf [file 13024_2008_51_MOESM1_ESM.pdf]
