# Supplementary material for: The role of Wnt signaling in neuronal dysfunction in Alzheimer's Disease
Source: Springer Nature journal article supplement (doi:10.1186/1750-1326-3-9), 2008-01-01

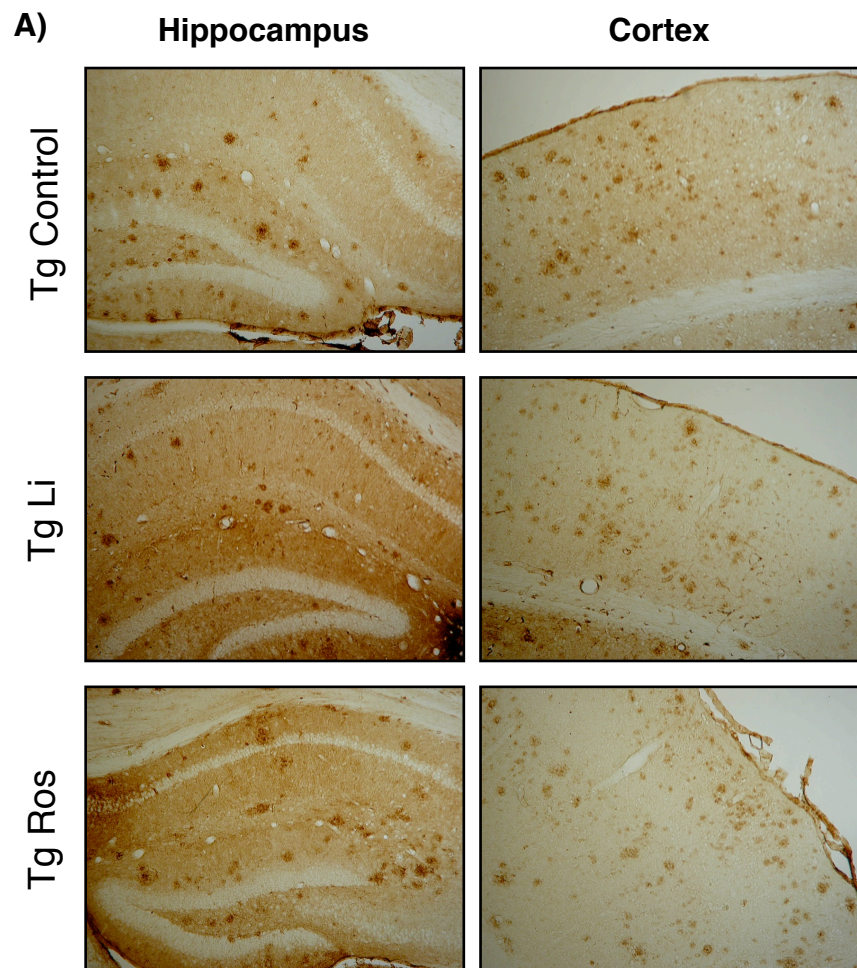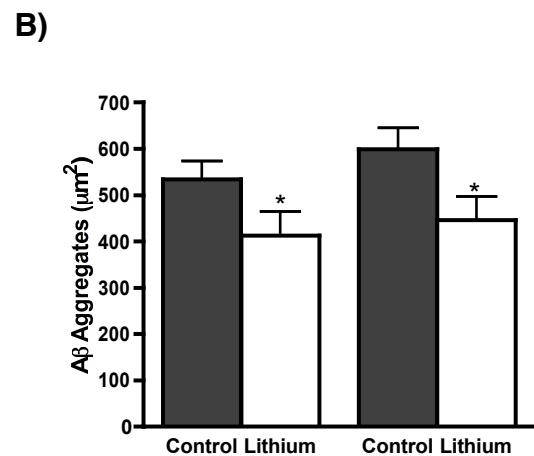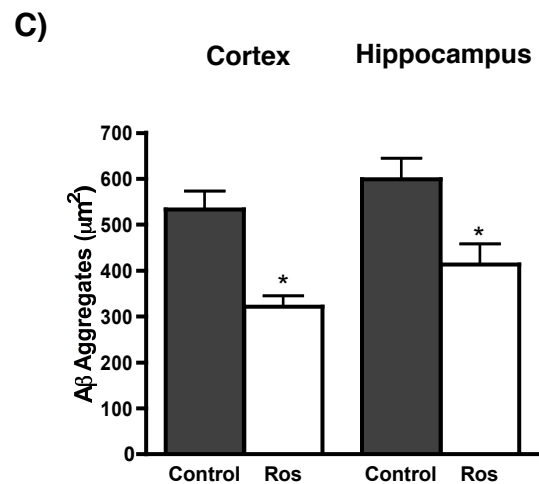

Supplement: 13024_2008_51_MOESM2_ESM.pdf [file 13024_2008_51_MOESM2_ESM.pdf]
