# Supplementary material for: The role of Wnt signaling in neuronal dysfunction in Alzheimer's Disease
Source: Springer Nature journal article supplement (doi:10.1186/1750-1326-3-9), 2008-01-01
Supplement: 13024_2008_51_MOESM4_ESM.pdf [file 13024_2008_51_MOESM4_ESM.pdf]

**Table 1****Heparin Modulation of the Wnt-3a ligand Effect on the Survival of Hippocampal Neurons Exposed to the A $\beta$  peptide**

| Treatment                                   | Cell Survival (%) |
|---------------------------------------------|-------------------|
| Control                                     | 100.0 $\pm$ 6.1   |
| A $\beta$                                   | 51.4 $\pm$ 2.9    |
| A $\beta$ + Wnt-3a                          | 75.9 $\pm$ 4.3    |
| A $\beta$ + Wnt-3a + heparin 0.1 $\mu$ g/ml | 88.3 $\pm$ 6.0 *  |
| A $\beta$ + Wnt-3a + heparin 1.0 $\mu$ g/ml | 103.1 $\pm$ 8.5 * |

Values represent means  $\pm$  s.d. of three experiments carried out in triplicate. Hippocampal neurons were pretreated with Wnt-3a ligand with or without heparin for 1h previous to the addition of 5  $\mu$ M A $\beta$ <sub>1-40</sub>. Neurons were then incubated for 24h and MTT reduction was determined.

\*Indicates P<0.05 compared with respect to A $\beta$  + Wnt-3a in a "T" test analyzed by the Sigma plot 2.0 program.
